# Supplementary material
Source: publisher figshare collection journal article supplement (https://frontiersin.figshare.com/ndownloader/files/20124263)
Supplement: Supplementary file [file 20124263]

## *Supplementary Materials*

### **1 Supplementary Table**

**Table S1.** DNA sequences used in the experiments.

| <b>Name</b>             | <b>Sequences (5' to 3')</b>         |
|-------------------------|-------------------------------------|
| Probe (P)               | Texas Red-TTGATGTCGTGTTTA           |
| P5                      | Texas Red-TTGAT                     |
| P10                     | Texas Red-TTGATGTCGT                |
| P20                     | Texas Red-TTGATGTCGTGTTTATAGCC      |
| Mutant-type target (MT) | AGGCTATA <u>AA</u> ACACGACATCAAGTAC |
| Wild-type target (WT)   | AGGCTA <u>C</u> AAACACGACATCAAGTAC  |
| Primer-Forward          | GTGATGTCGGGGTAGATCTCC               |
| Primer-Reverse          | GACCAAGTGTTAATGACCGTG               |

The mutant site (rs1051730 (Han et al., 2015)) is marked in red underline.

## 2 Supplementary Figures

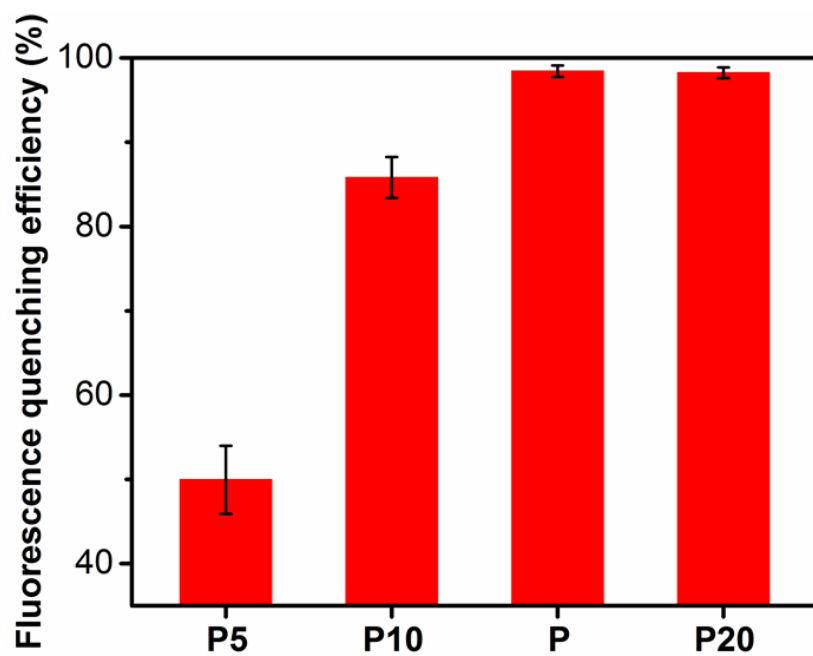

**Figure S1.** Fluorescence quenching efficiencies  $((F_0-F)/F_0)$  of single-layer Ta<sub>2</sub>NiS<sub>5</sub> nanosheets for single-stranded DNA probes with different lengths. The concentration of Ta<sub>2</sub>NiS<sub>5</sub> nanosheets was fixed at 5.0  $\mu\text{g mL}^{-1}$ . P5, P10, P, and P20 denote the probes showed in Table S1.

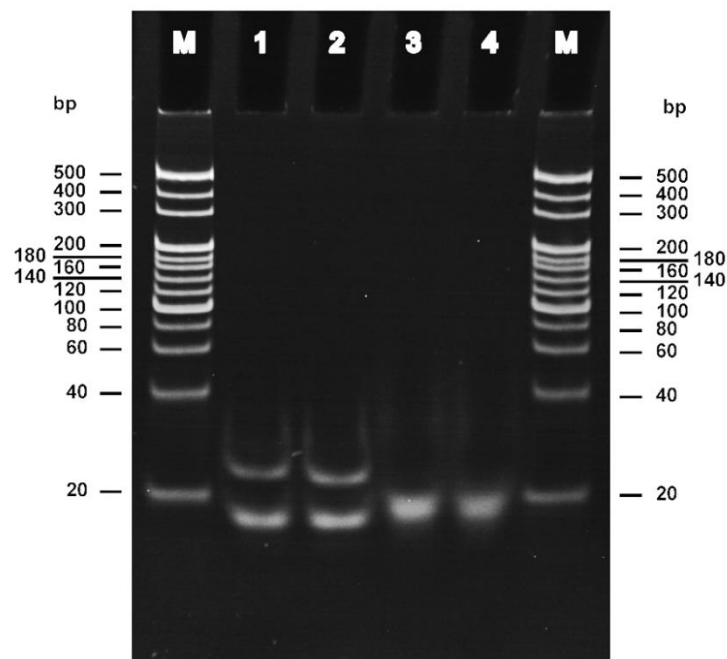

**Figure S2.** Polyacrylamide gel electrophoresis image for the hybridization of probe DNA and target DNA. Lane M: DNA marker; lane 1: 1  $\mu\text{M}$  P and 100 nM mutant-type target; lane 2: 1  $\mu\text{M}$  P and 100 nM wild-type target; lane 3: 1  $\mu\text{M}$  P and 100 nM mutant-type target with 0.25  $\text{U } \mu\text{L}^{-1}$  Exo III; and lane 4: 1  $\mu\text{M}$  P and 100 nM wild-type target with 0.25  $\text{U } \mu\text{L}^{-1}$  Exo III.

The digestion process was confirmed by the polyacrylamide gel electrophoresis. As shown in Fig. S3, double-strand DNAs were formed by the hybridization of probe (P) with the mutant-type target (MT) and the wild-type target (WT), respectively, exhibiting two bright bands with almost the same mobility (lanes 1 and 2). Each band in both lane 1 and 2 was accompanied by another band due to the excess P. Upon adding Exo III into the aforementioned system, migration shifts of the bright bands were observed and the bright band in lane 3 showed more shift than that in lane 4, suggesting that P was completely digested in MT system and partially digested in WT system due to the single-base mismatch with WT.

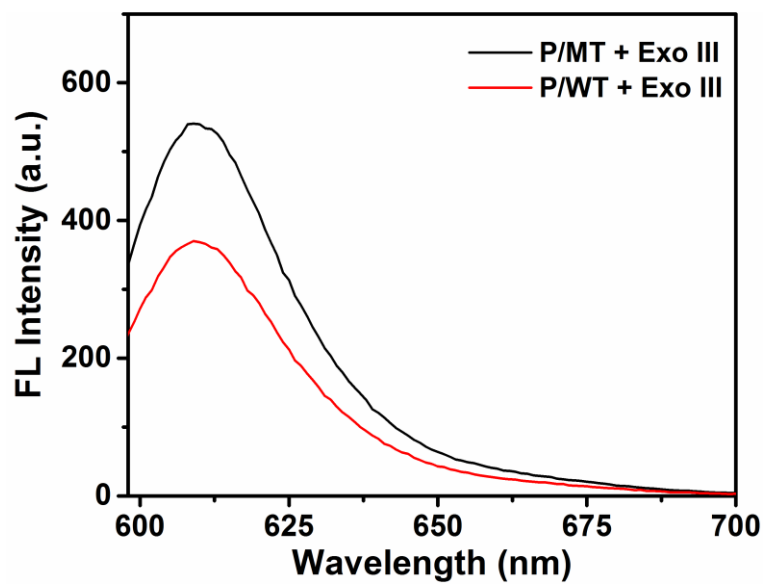

**Figure S3.** Fluorescence spectra of P/MT + Exo III (black), and P/WT + Exo III (red) in the absence of Ta<sub>2</sub>NiS<sub>5</sub> nanosheets (P = 1  $\mu$ M; MT = 100 nM; WT = 100 nM, Exo III = 0.25 U  $\mu$ L<sup>-1</sup>). The excitation wavelength is 590 nm.

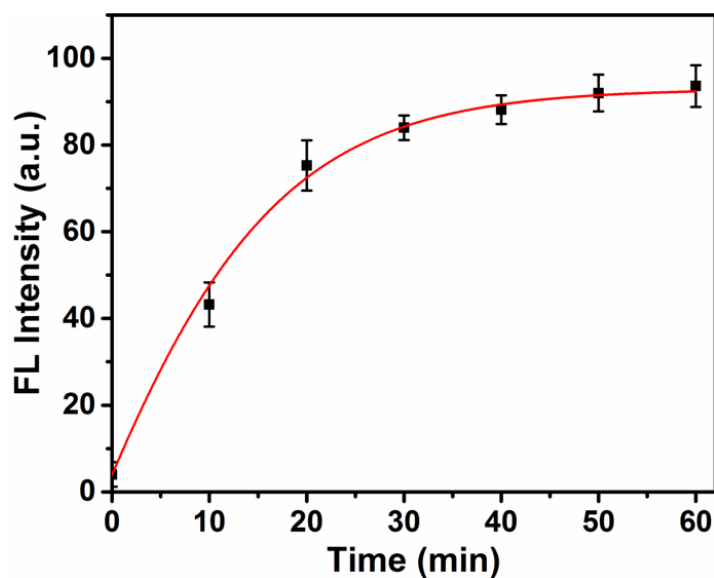

**Figure S4.** Fluorescence intensity of P/MT after different incubation time with Exo III ( $0.25 \text{ U } \mu\text{L}^{-1}$ ) in the presence of  $\text{Ta}_2\text{NiS}_5$  ( $5 \text{ } \mu\text{g mL}^{-1}$ ).

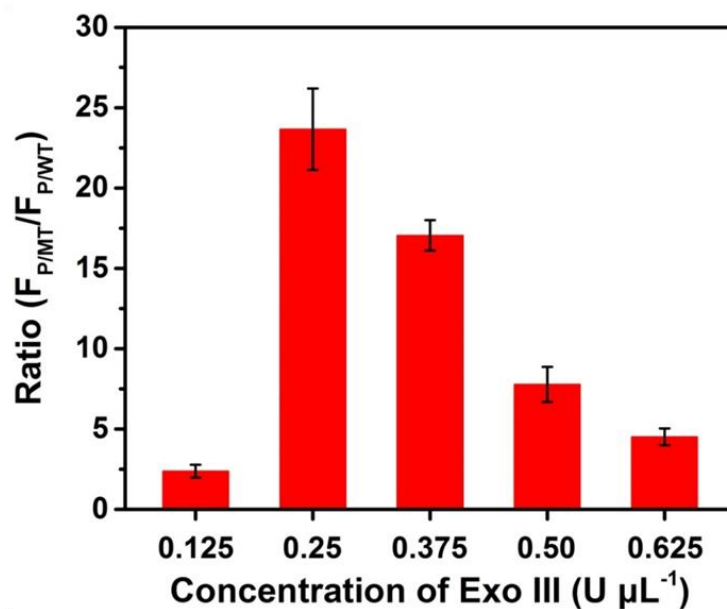

**Figure S5.** The fluorescence intensity ratio ( $F_{\text{P/MT}}/F_{\text{P/WT}}$ ) at 610 nm with different concentration of Exo III (0.125, 0.25, 0.375, 0.50 and  $1.0 \text{ U } \mu\text{L}^{-1}$ ) in the presence of  $\text{Ta}_2\text{NiS}_5$  nanosheets ( $5.0 \text{ } \mu\text{g mL}^{-1}$ ). The concentration of P, MT, and WT are  $1 \text{ } \mu\text{M}$ ,  $100 \text{ nM}$ , and  $100 \text{ nM}$ , respectively. The volume of solution is fixed at  $50 \text{ } \mu\text{L}$ . The excitation wavelength is  $590 \text{ nm}$ .

Table 2 Comparison of SNP biosensors.

| Nanomaterial platform                      | Detection type           | LOD    | Linear range      | Reference             |
|--------------------------------------------|--------------------------|--------|-------------------|-----------------------|
| Ta <sub>2</sub> NiS <sub>5</sub> nanosheet | Fluorescence             | 250 fM | 1 pM-100 nM       | This work             |
| Ti <sub>3</sub> C <sub>2</sub> nanosheet   | Electrochemiluminescence | 1 nM   | NA                | (Fang et al., 2018)   |
| MoS <sub>2</sub> @Au NPs                   | Fluorescence             | 1 nM   | 0-10 nM           | (Yan et al., 2019)    |
| Au NPs                                     | Colorimetry              | 6.1 nM | 50 nM-200 nM      | (Xing et al., 2019)   |
| SWNTs                                      | Fluorescence             | 60 nM  | 100 nM- 1 $\mu$ M | (Xu et al., 2018)     |
| GO                                         | Electrochemistry         | NA     | 5 pM-5nM          | (Lanche et al., 2018) |

Note: LOD: limit of detection, NA: No available data.

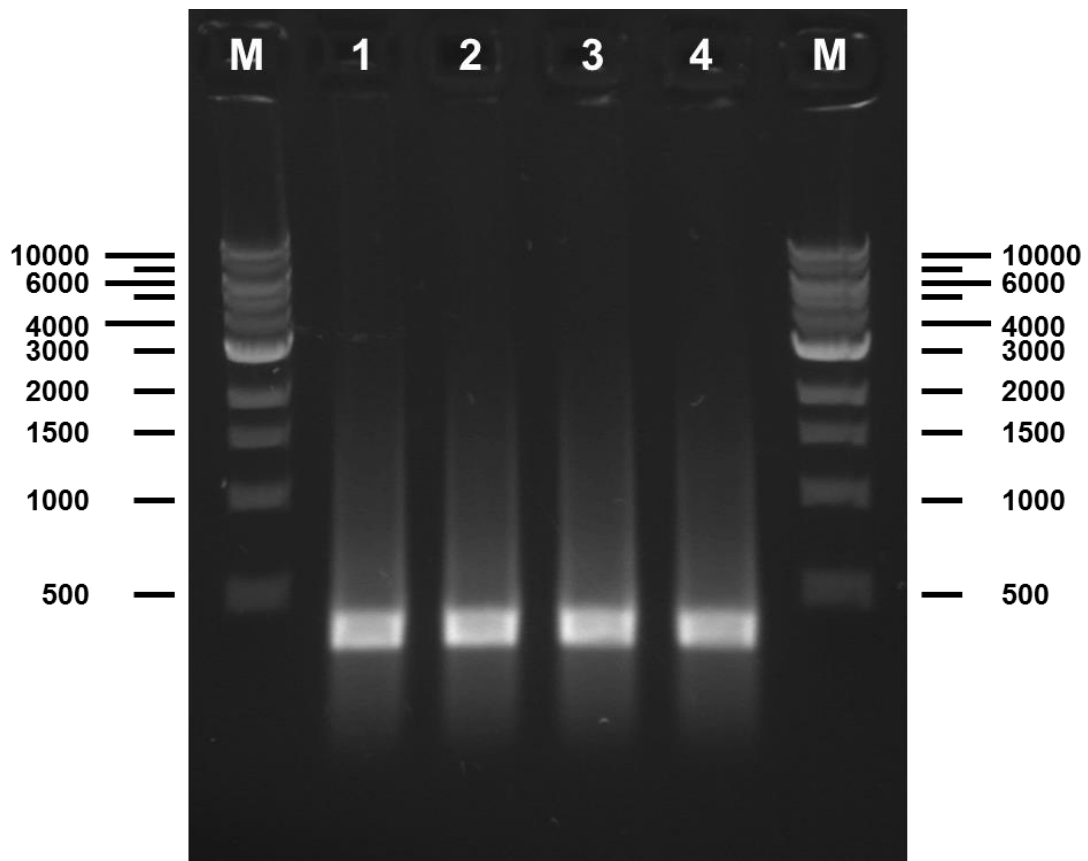

**Figure S6.** Agarose gel electrophoresis image of the PCR products. Lane 1-2: mutant-type samples; Lane 3-4: wild-type samples. Lane M is DNA ladder. The bright bands were the PCR products near the position of 500 base-pairs DNA markers, consistent with the predicted length of 359 base-pairs for target PCR amplicons. The detailed sequences of the PCR products were confirmed through DNA sequencing.

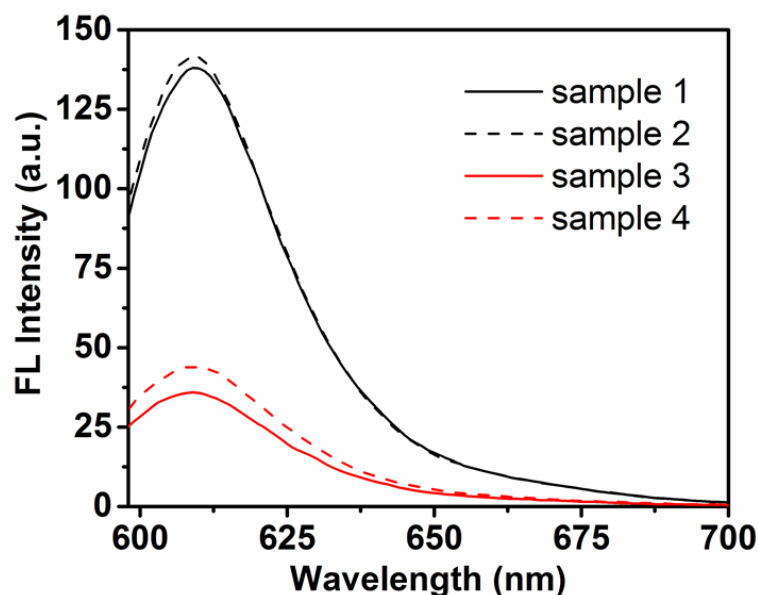

**Figure S7.** Fluorescence spectra of the human genomic samples (sample 1-2: mutant-type samples; sample 3-4: wild-type samples;  $P = 1 \mu\text{M}$ ;  $\text{Exo III} = 0.25 \text{ U } \mu\text{L}^{-1}$ ;  $\text{Ta}_2\text{NiS}_5 = 5 \mu\text{g mL}^{-1}$ ).

## Reference

- Fang, Y., Yang, X., Chen, T., Xu, G., Liu, M., Liu, J., et al. (2018). Two-dimensional titanium carbide (MXene)-based solid-state electrochemiluminescent sensor for label-free single-nucleotide mismatch discrimination in human urine. *Sensor Actuat B-Chem.* 263, 400-407. doi: 10.1016/j.snb.2018.02.102.
- Han, Z., Jiang, Q., Zhang, T., Wu, X., Ma, R., Wang, J., et al. (2015). Analyzing large-scale samples confirms the association between the rs1051730 polymorphism and lung cancer susceptibility. *Sci rep.* 5, 15642. doi: 10.1038/srep15642.
- Lanche, R., Pachauri, V., Munief, W.-M., Müller, A., Schwartz, M., Wagner, P., et al. (2018). Graphite oxide electrical sensors are able to distinguish single nucleotide polymorphisms in physiological buffers. *FlatChem.* 7, 1-9. doi: 10.1016/j.flatc.2017.12.001.
- Xing, S., Xu, X., Fu, P., Xu, M., Gao, T., Zhang, X., et al. (2019). Colorimetric detection of single base-pair mismatches based on the interactions of PNA and PNA/DNA complexes with unmodified gold nanoparticles. *Colloid Surface B.* 181, 333-340. doi: 10.1016/j.colsurfb.2019.05.069.
- Xu, W., Xing, S., Xu, X., Xu, M., Fu, P., Gao, T., et al. (2018). Peptide nucleic acid-assisted label-free detection of single-nucleotide polymorphisms based on light scattering of carbon nanotubes. *ACS Omega.* 3, 17835-17841. doi: 10.1021/acsomega.8b02655.
- Yan, L., Deng, Z., Shi, H., Xie, B., and Gao, L. (2019). A Method for SNPs Detection Using  $\text{MoS}_2/\text{AuNPs}$  and SYBR Green I Combining with Enzyme Digestion. *New J Chem.* doi: 10.1039/C9NJ04319E.
